# Supplementary material
Source: Springer Nature journal article supplement (https://www.springerprofessional.de/resource/supplementary/40493_2013_5_MOESM7_ESM.pdf/11899616)

### Ratings for comfort of use

User leaves screen → automated removal of data

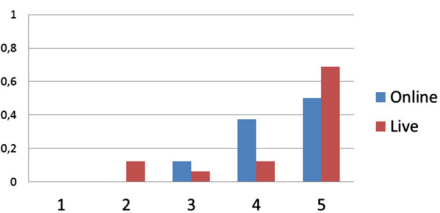

### Ratings for privacy

User leaves screen → automated removal of data

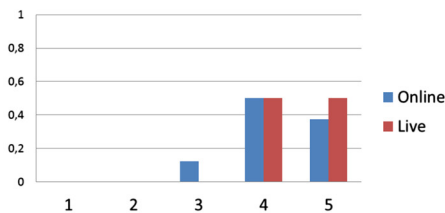

### Ratings for reliability

User leaves screen → automated removal of data

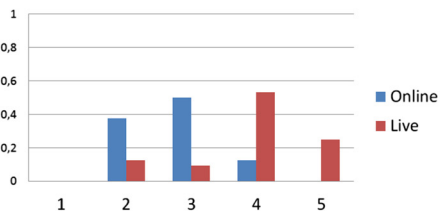

### Ratings for trust

User leaves screen → automated removal of data

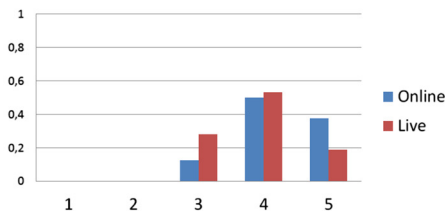

### Ratings for transparency

User leaves screen → automated removal of data

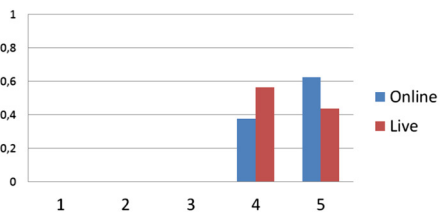

### Ratings for controllability

User leaves screen → automated removal of data

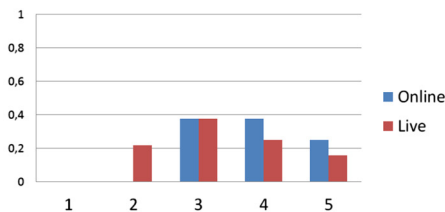

### Ratings for automated removal of data

User leaves screen → automated removal of data

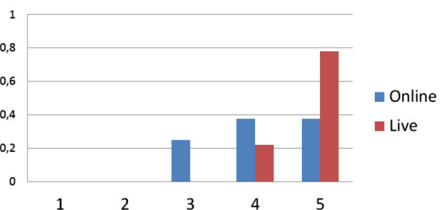

### Ratings for no reaction

User leaves screen → no reaction

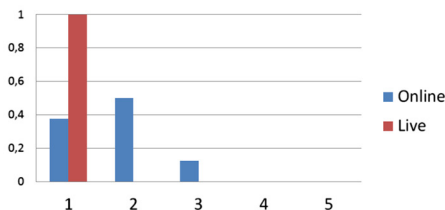

Supplement: MOESM7 [file 11899616]
